# Supplementary material
Source: PubMed Central journal article supplement (PMC2885134)
Supplement: NIHMS207037-supplement-supplemental_material.pdf [file NIHMS207037-supplement-supplemental_material.pdf]

## Inhibition of Lp-PLA<sub>2</sub> reduces complex coronary atherosclerotic plaque development

Wilensky RL, Shi Y, Mohler ER III<sup>1</sup>, Hamamdzcic H, Burgert ME, Li J, Postle A, Fenning RS, Bollinger JG, Hoffman BE, Pelchovitz DJ, Yang J, Mirabile RC, Webb CL, Zhang L, Zhang P, Gelb MH, Walker MC, Zalewski A, Macphee CH.

### Supplementary methods and tables

**Supplementary Table 1. Arterial PC composition by mass spectrometry**

|               | No DM/HC                                          | DM/HC<br>Control  | DM/HC<br>Darapladib           |
|---------------|---------------------------------------------------|-------------------|-------------------------------|
|               | (Values normalized to % total PC; mean $\pm$ sem) |                   |                               |
| <b>PC</b>     | 97.30 $\pm$ 0.30                                  | 92.35 $\pm$ 0.76* | 94.36 $\pm$ 0.36 <sup>#</sup> |
| <b>lysoPC</b> | 2.40 $\pm$ 0.23                                   | 7.33 $\pm$ 0.75*  | 5.31 $\pm$ 0.37 <sup>#</sup>  |
| <b>oxPC</b>   | 0.30 $\pm$ 0.08                                   | 0.32 $\pm$ 0.06   | 0.33 $\pm$ 0.04               |

Total lipid extracts from iliac arteries harvested at study end were analyzed by mass spectrometry. All results were calculated relative to the total concentration of PC within each sample. \* $P < 0.01$  no DM/HC versus DM/HC control; <sup>#</sup> $P < 0.05$  DM/HC control versus darapladib ( $n = 3$  no DM/HC, 16 DM/HC control, 18 DM/HC treated).

## Supplementary Table 2. Influence of darapladib on coronary artery gene expression

Data ranked according to the degree of upregulation induced by DM/HC

| Gene Description                                                                       | Human Gene Symbol | Human Entrez GeneID | Upregulation with DM/HC (fold) | Influence of Darapladip |         |
|----------------------------------------------------------------------------------------|-------------------|---------------------|--------------------------------|-------------------------|---------|
|                                                                                        |                   |                     |                                | % Change                | P value |
| Matrix metalloproteinase 9 (gelatinase B, 92kDa gelatinase, 92kDa type IV collagenase) | MMP9              | 4318                | 69.8                           | -72                     | 0.090   |
| CD4 antigen (p55)                                                                      | CD4               | 920                 | 25.1                           | -30                     | 0.103   |
| Interleukin 1 receptor antagonist                                                      | IL1RN             | 3557                | 21.1                           | -56                     | 0.019   |
| cytochrome b-245, beta polypeptide (chronic granulomatous disease), gp91phox           | CYBB              | 1536                | 19.4                           | -55                     | 0.024   |
| CD48 antigen (B-cell membrane protein)                                                 | CD48              | 962                 | 19.2                           | -53                     | 0.068   |
| apolipoprotein E                                                                       | APOE              | 348                 | 17.4                           | -47                     | 0.061   |
| chitinase 3-like 1 (cartilage glycoprotein-39)                                         | CHI3L1            | 1116                | 17.3                           | -57                     | 0.076   |
| CD68 antigen                                                                           | CD68              | 968                 | 16.7                           | -48                     | 0.040   |
| cathepsin S                                                                            | CTSS              | 1520                | 16.0                           | -53                     | 0.020   |
| phospholipase A2, group VII (platelet-activating factor acetylhydrolase, plasma)       | PLA2G7 (Lp-PLA2)  | 7941                | 14.6                           | -55                     | 0.012   |

|                                                                                                                            |         |        |      |     |       |
|----------------------------------------------------------------------------------------------------------------------------|---------|--------|------|-----|-------|
| integrin, beta 2 (antigen CD18 (p95), lymphocyte function-associated antigen 1; macrophage antigen 1 (mac-1) beta subunit) | ITGB2   | 3689   | 14.3 | -54 | 0.029 |
| chemokine (C-C motif) receptor 1                                                                                           | CCR1    | 1230   | 11.0 | -48 | 0.192 |
| N-acetylneuraminate pyruvate lyase (dihydrodipicolinate synthase)                                                          | NPL     | 80896  | 10.7 | -42 | 0.048 |
| neutrophil cytosolic factor 1 (p47phox)                                                                                    | NCF1    | 653361 | 10.4 | -54 | 0.025 |
| heparan sulphate (glucosamine) 3-O-sulfotransferase 2                                                                      | HS3ST2  | 9956   | 9.8  | -55 | 0.162 |
| ATP-binding cassette, sub-family A (ABC1), member 1                                                                        | ABCA1   | 19     | 9.1  | -22 | 0.128 |
| scavenger receptor class B, member 1                                                                                       | SCARB1  | 949    | 7.3  | -34 | 0.150 |
| ecotropic viral integration site 2B                                                                                        | EVI2B   | 2124   | 7.2  | -41 | 0.043 |
| Fas ligand (TNF superfamily, member 6)                                                                                     | FASLG   | 356    | 7.2  | -40 | 0.066 |
| bridging integrator 2                                                                                                      | BIN2    | 51411  | 7.1  | -53 | 0.009 |
| chemokine (C-C motif) ligand 5                                                                                             | CCL5    | 6352   | 7.1  | -39 | 0.046 |
| hypothetical protein FLJ22457                                                                                              | DENND2D | 79961  | 6.9  | -45 | 0.034 |
| adrenergic, beta-3-, receptor                                                                                              | ADRB3   | 155    | 6.8  | -21 | 0.549 |
| plasminogen activator, urokinase receptor                                                                                  | PLAUR   | 5329   | 6.7  | -39 | 0.026 |
| heme oxygenase (decycling) 1                                                                                               | HMOX1   | 3162   | 6.4  | -44 | 0.033 |
| CD40 ligand (TNF superfamily, member 5,                                                                                    | CD40LG  | 959    | 6.4  | -13 | 0.709 |

|                                                                  |          |       |     |     |       |
|------------------------------------------------------------------|----------|-------|-----|-----|-------|
| hyper-IgM syndrome)                                              |          |       |     |     |       |
| uncoupling protein 2 (mitochondrial, proton carrier)             | UCP2     | 7351  | 6.1 | -53 | 0.030 |
| interleukin 2 receptor, alpha                                    | IL2RA    | 3559  | 5.9 | -29 | 0.399 |
| platelet-activating factor receptor                              | PTAFR    | 5724  | 5.8 | -49 | 0.009 |
| GM2 ganglioside activator                                        | GM2A     | 2760  | 5.4 | -50 | 0.016 |
| vascular cell adhesion molecule 1                                | VCAM1    | 7412  | 5.3 | -7  | 0.680 |
| leukocyte-associated Ig-like receptor 1                          | LAIR1    | 3903  | 4.8 | -42 | 0.016 |
| CD163 antigen                                                    | CD163    | 9332  | 4.8 | -34 | 0.141 |
| chemokine (C-C motif) ligand 2                                   | CCL2     | 6347  | 4.7 | -45 | 0.084 |
| interleukin 1, beta                                              | IL1B     | 3553  | 4.7 | -39 | 0.157 |
| CD36 antigen (collagen type I receptor, thrombospondin receptor) | CD36     | 948   | 4.5 | -17 | 0.412 |
| ADAM-like, decysin 1                                             | ADAMDEC1 | 27299 | 4.4 | 26  | 0.621 |
| interleukin 18 (interferon-gamma-inducing factor)                | IL18     | 3606  | 4.1 | -14 | 0.515 |
| chemokine (C-X-C motif) receptor 3                               | CXCR3    | 2833  | 4.0 | -68 | 0.015 |
| interleukin 8                                                    | IL8      | 3576  | 3.8 | -21 | 0.655 |
| Peroxisome proliferative activated receptor, gamma               | PPARG    | 5468  | 3.8 | -24 | 0.357 |
| ecotropic viral integration site 2A                              | EVI2A    | 2123  | 3.7 | -39 | 0.041 |

|                                                                                                                              |         |       |     |     |       |
|------------------------------------------------------------------------------------------------------------------------------|---------|-------|-----|-----|-------|
| arachidonate 5-lipoxygenase                                                                                                  | ALOX5   | 240   | 3.6 | -14 | 0.469 |
| Major histocompatibility complex, class II, DM alpha                                                                         | HLA-DMA | 3108  | 3.6 | -38 | 0.007 |
| transmembrane 7 superfamily member 1 (upregulated in kidney)                                                                 | TM7SF1  | 7107  | 3.5 | 2   | 0.947 |
| intercellular adhesion molecule 1 (CD54), human rhinovirus receptor                                                          | ICAM1   | 3383  | 3.5 | -26 | 0.122 |
| CD83 antigen (activated B lymphocytes, immunoglobulin superfamily)                                                           | CD83    | 9308  | 3.4 | -39 | 0.139 |
| bone morphogenetic protein 2                                                                                                 | BMP2    | 650   | 3.3 | 15  | 0.682 |
| chemokine (C-X-C motif) ligand 16                                                                                            | CXCL16  | 58191 | 3.3 | -29 | 0.053 |
| renal tumor antigen                                                                                                          | RAGE    | 5891  | 3.2 | -19 | 0.627 |
| solute carrier family 27 (fatty acid transporter), member 4                                                                  | SLC27A4 | 10999 | 3.2 | -39 | 0.047 |
| $\beta$ -arrestin 2                                                                                                          | ARRB2   | 409   | 3.0 | -47 | 0.004 |
| chemokine (C-C motif) ligand 4                                                                                               | CCL4    | 6351  | 3.0 | -35 | 0.153 |
| major facilitator superfamily domain containing 1                                                                            | MFSD1   | 64747 | 3.0 | -32 | 0.080 |
| integrin, alpha M (complement component receptor 3, alpha; also known as CD11b (p170), macrophage antigen alpha polypeptide) | ITGAM   | 3684  | 3.0 | -33 | 0.169 |
| CCAAT/enhancer binding protein (C/EBP), alpha                                                                                | CEBPA   | 1050  | 2.9 | -27 | 0.202 |
| fatty acid synthase                                                                                                          | FASN    | 2194  | 2.8 | -52 | 0.147 |

|                                                                                                  |        |      |     |     |       |
|--------------------------------------------------------------------------------------------------|--------|------|-----|-----|-------|
| Peroxisome proliferative activated receptor, delta                                               | PPARD  | 5467 | 2.8 | -37 | 0.123 |
| chemokine (C-X3-C motif) receptor 1                                                              | CX3CR1 | 1524 | 2.6 | -32 | 0.425 |
| interleukin 6 (interferon, beta 2)                                                               | IL6    | 3569 | 2.5 | -26 | 0.341 |
| Prostaglandin-endoperoxide synthase 1 (prostaglandin G/H synthase and cyclooxygenase)            | PTGS1  | 5742 | 2.5 | -6  | 0.879 |
| chemokine (C-C motif) ligand 3                                                                   | CCL3   | 6348 | 2.4 | -38 | 0.198 |
| platelet/endothelial cell adhesion molecule (CD31 antigen)                                       | PECAM1 | 5175 | 2.3 | 27  | 0.455 |
| insulin receptor substrate 1                                                                     | IRS1   | 3667 | 2.2 | 10  | 0.819 |
| endothelin receptor type A                                                                       | EDNRA  | 1909 | 2.2 | 18  | 0.634 |
| tumor necrosis factor (TNF superfamily, member 2)                                                | TNF    | 7124 | 2.1 | -2  | 0.930 |
| chemokine (C-C motif) receptor 2                                                                 | CCR2   | 1231 | 1.9 | -86 | 0.026 |
| basigin (OK blood group)                                                                         | BSG    | 682  | 1.7 | 9   | 0.776 |
| mesenchyme homeo box 2 (growth arrest-specific homeo box)                                        | MEOX2  | 4223 | 1.6 | 5   | 0.926 |
| tissue inhibitor of metalloproteinase 1 (erythroid potentiating activity, collagenase inhibitor) | TIMP1  | 7076 | 1.6 | -47 | 0.105 |
| early growth response 1                                                                          | EGR1   | 1958 | 1.6 | -26 | 0.694 |
| transforming growth factor, beta 1 (Camurati-Engelmann disease)                                  | TGFB1  | 7040 | 1.6 | -30 | 0.426 |

|                                                                                                              |        |      |     |      |       |
|--------------------------------------------------------------------------------------------------------------|--------|------|-----|------|-------|
| Prostaglandin-endoperoxide synthase 2 (prostaglandin G/H synthase and cyclooxygenase)                        | PTGS2  | 5743 | 1.6 | 38   | 0.485 |
| adiponectin, C1Q and collagen domain containing                                                              | ADIPOQ | 9370 | 1.5 | 56   | 0.620 |
| CD97 antigen                                                                                                 | CD97   | 976  | 1.5 | -4   | 0.927 |
| cystatin A (stefin A)                                                                                        | CSTA   | 1475 | 1.4 | -213 | 0.178 |
| adrenergic, beta-1-, receptor                                                                                | ADRB1  | 153  | 1.3 | 131  | 0.602 |
| insulin-like growth factor 1 receptor                                                                        | IGF1R  | 3480 | 1.2 | -30  | 0.842 |
| chemokine (C-X-C motif) ligand 12 (stromal cell-derived factor 1)                                            | CXCL12 | 6387 | 1.2 | 17   | 0.886 |
| leptin (obesity homolog, mouse)                                                                              | LEP    | 3952 | 1.2 | -11  | 0.961 |
| Peroxisome proliferative activated receptor, alpha                                                           | PPARA  | 5465 | 1.1 | 107  | 0.889 |
| Complement factor D (adipsin) (PREPROADIPSIN ML)                                                             | CFD    | 1675 | 1.1 | 72   | 0.825 |
| CD34 antigen                                                                                                 | CD34   | 947  | 1.1 | 128  | 0.825 |
| Smoothelin                                                                                                   | SMTN   | 6525 | 0.8 | -19  | 0.886 |
| matrix Gla protein                                                                                           | MGP    | 4256 | 0.8 | -49  | 0.586 |
| Actin, alpha 2, smooth muscle, aorta                                                                         | ACTA2  | 59   | 0.8 | -40  | 0.559 |
| serine (or cysteine) proteinase inhibitor, clade E (nexin, plasminogen activator inhibitor type 1), member 1 | PAI-1  | 5054 | 0.7 | -74  | 0.358 |

For myeloperoxidase no measurable transcripts were found. A statistically significant effect of darapladib is highlighted in greens.

**Supplementary Table 3 TAQMAN sequences for all genes studied**

| <u>Human Gene Symbol</u> | <u>Forward</u>           | <u>Reverse</u>           | <u>Probe</u>                      |
|--------------------------|--------------------------|--------------------------|-----------------------------------|
| ABCA1                    | AAGGTTGGTGAGTGGGCGAT     | ATGGCTGTTGAGAGCTTGCG     | TCCATACTTCACGAGGCCAGTTTCCG        |
| ACTA2                    | AATGGGACAAAAAGACAGCTACGT | CGTGTTCATTGGGTACTTCAAGGT | CGAAGCCCAAAGCAA<br>AAGAGGAATCCT   |
| ADAMDEC1                 | ACTGAGCACCTCCTGGGTCC     | GGCCACAGAATCCCGTTCAT     | CCAAAAGCCCTCAGAT<br>CATGGAACACTGC |
| ADIPOQ                   | ACTAGCCCTGCCAGTCTCG      | GGTACCGTTGTGGCCAGGAT     | CACCGAGAAGCCTGG<br>AGCACTACTGCC   |
| ADRB1                    | GGACGTCGGTGGACGTA CTG    | CAGCAGGCTCTGGTAGCGAA     | CGGCCAGTATCGAGA<br>CCCTGTGTGCA    |
| ADRB3                    | GGGCACAGAGTAGGGAACCG     | CTGGTGACCTTCGTTCTCTG     | CCAGGCCTCTTTTGCT<br>TCAACCCCAAG   |
| ALOX5                    | TGTGCTTCCCTGAGAACATCAA   | CCGTCGTCCC GG TAGAAGT    | CATGGACAGCAAAGA<br>AGACATTCACC    |
| APOE                     | AGATGCGTGACGAGCTGGAG     | CCGCATGTCTTCCACCAGAG     | CAACTGGCTGCCTTG<br>CTCCTCCACTT    |
| ARBB2                    | GCTCAGCGACAACCGAGAGA     | AGGACACGAGGATTCCCAGC     | CTTGTGGCACCCCTCC<br>TTCACGATGGT   |
| BIN2                     | CTACAGCAGCGAGTGGGACG     | CGCTGAACTGGGCGACATAG     | CTGACCAGGCCTTGA<br>GGACCATGGA     |
| BMP2                     | CCCACGGAGGAGTTTATACC     | TGGAGTTGGCTGTTGCAGGT     | TCCAAAGTCTCCTGTG<br>TCTGTTCCCGA   |
| BSG                      | GGGCCACCTAATGTCAAGGC     | AAGGAGTCCGACTTGCAGGC     | CTCCCCTCGGTAGC<br>GTGCTCTGACTT    |
| CCL2                     | CTCCACACCGAAGCTTGAA      | AAGGACCTGGGTGCAGAAGG     | AGCATGAAGGTCTCTG<br>CAGCCCTCTG    |
| CCL3                     | CTCAGAGCTCCAGGCCACT      | CTCCAAGCCCGGTGCATCT      | ATGTATTCCTGGACCC<br>AGGCGTCTCTG   |
| CCL4                     | CTCTCCTCCGCCAAGACCAT     | CTGAGAGCGCTGGAGAGCAG     | TGACTGTCCTCTCCCT<br>CCTGGTCTCTGG  |
| CCL5                     | TCCATGGCAGCAGTCGTCTT     | TCAGGCTCAAGGCTTCTCTCC    | AGAAAGAACCGCCAG<br>GTGTGTGCCAAC   |
| CCR1                     | CTTTTGGACCCCTACAATCTG    | CTGATCGGTGAACAGGGATTC    | CTGTGTTTGTCTCTGC<br>TTTCCA        |
| CCR2                     | GACCAAGCCATGCAGGTGAC     | GTTTGGCAATGTGCTTTCGG     | TGACGCACTGCTGCAT<br>CAACCCTATCA   |
| CD163                    | CCCTCCTGTGGGATTGTCC      | TCTGAGCACGTACAGCAGC      | CCAGATCCTGGGGCC<br>ACAGTGACTGT    |



|         |                           |                          |                                           |
|---------|---------------------------|--------------------------|-------------------------------------------|
| CD34    | GCTTGGGCTGCTCTTTCTCC      | GCCACTGAGGCAGAGGATGA     | TCTCCAAGCCATGCCT<br>CTTGACTGTGC           |
| CD36    | ACAGAGTTCGTTATCTAGCCAAGGA | CCATTGGGCTGTAGGAAAGAGA   | AATATAACCCAGGACC<br>CTGAGACCCACACA        |
| CD4     | AGATCTCGCAGAGCTGCCGT      | AGGCGAGAGGTCAACTCGGT     | CATGACCGCCCAGAA<br>TCTTGGTCTGGT           |
| CD40LG  | TCATAGCCAGCCTCTGCCTG      | ACTCGAAGACTCCGCCAAG      | TAAGATTCTCTCCGAC<br>CCGCTTGGGGA           |
| CD48    | AAAGTGGCGCATTGCACATC      | ACAGGGTCAAGCACCGTCAG     | TACGGGTGTCCCCATT<br>CACCTTCAGGA           |
| CD68    | TGACATGACGTTGGCTGTGC      | GTCACCGTGAAGGATGGCAG     | CTTCTTAGGGGCCCT<br>GCTGGGACTCCT           |
| CD83    | AAGCCCTTGAGCCAGTGAC       | TCGTGCTTCTGTCCAGTGGG     | TTTTTCCCGAGTCGAA<br>GGCTCC                |
| CD97    | CATTGCCAGCTCTTCGTGT       | TAGGACAGGACCCAGCTCCG     | TGCACCTGGGTCTTC<br>GGCTGTACTC             |
| CEBPA   | AGCGCAACGTGGAGACTCA       | GTTGCGGGCTCAGTTGTTC      | CGGTCATTGTC<br>ACTGGTCAGCT<br>CCA         |
| CFD     | AAGCTGCAGGTTCTCCTGGG      | TGGTGTGAGGCTGGCTGTCT     | CTCGAAGCGCCTGTA<br>CGACGTGCTC             |
| CHI3L1  | AAGTCGGTGCCACCATTCT       | CTCTGTTCCAGGCAGGGCTT     | TGGACTGGACCTAGC<br>CTGGATCTCCCC           |
| CSTA    | TCCTGCCAGAGAAGATGGA       | CCTGGATTTCTGGAGTGGA      | TCTGGCTTCAGTTAAG<br>CCCCAGGCAT            |
| CTSS    | CCACCTTGATCGTCACTGG       | TTCCCATCGAATGCTCCAGA     | TTCTTTTCCAGATGA<br>GACGCCGTGCT            |
| CX3CR1  | TGAGGAACCAGCCACCAACT      | CTCTCAACAGCACCAATTAAGCAT | TCCCAAGCTTCAACTT<br>CCCCACAGC             |
| CXCL12  | TGCCGATTCTTTGAGAGCCA      | CTGAAGGGCACAGTTCGGAG     | CGTTGCCAGAGCCAA<br>CATCAAGCATCT           |
| CXCL16  | GAACATCAGCCCTGGTGCC       | CTGACGTGACTGCTCCTGCC     | TTGGTCATCATTTTCC<br>TTCTACCGGA            |
| CXCR3   | CTGTCTGCTCTTTGCGCTCC      | GCTGTACTGGCAGTGGGTGG     | CATCTTCTATCGGCC<br>CACCTGATGA             |
| CYBB    | CATGCCTTCGAGTGGTTTGC      | GGCAAAGTGATTGGCCTGTG     | ACCCAGATGCAGGAG<br>AGGAACAACGCC           |
| DENND2D | ACATCAAGCGGGAGGCAAAT      | ACAAATCGACGTTGGCCTT      | AAGGCCACTTCCAAGA<br>ACGGGCCTTCT           |
| EDNRA   | CTGATAGCCAGCCTTGCCT       | GCCCAGCCAGCAGCTTAAAT     | TGGAGACCTCATCTAT<br>GTGGTCATTGATCTCC<br>C |

|         |                           |                           |                                   |
|---------|---------------------------|---------------------------|-----------------------------------|
| EGR1    | GCAGTGACCACCTCACCACC      | GCCGCAAGTGGATCTTGGTA      | CTTGC GTTCATCGCTC<br>CTGGCAAACCTT |
| EVI2A   | GGCAAGCGTCAGCCTAGAAG      | TAGGTTGGGCCCTGTGACCT      | CTGGCAAGCAGTGGT<br>CTATGGCCTGCT   |
| EVI2B   | ATTCTGCAGGTGGAGGTGGC      | CCAGGACCATTCCAACAATGA     | TTCCTCTGACTCCCA<br>TCAAGACCTCA    |
| FASLG   | TCCCTCTGGAATGGGAAGACA     | CATTGATCACAAGGCTGCC       | TTCACCCAGAGACCA<br>AGGCAATTCCA    |
| FASN    | GCACGAACACAGACGGTTCC      | TACAGGGAGCGGATGAGCTG      | AAGGAGCAAGGTGTG<br>ACCTTCCCCTCG   |
| GAPDH   | CATGACCACAGTCCATGCCA      | AGCTCAGGGATGACCTTGCC      | ACCCAGAAGACTGTG<br>GATGGCCCCTCT   |
| GM2A    | TCAAAGCCGGCACCTACTCA      | AGGGAGATCTTGGCACAGCC      | CTGCCTCAACTGGAG<br>CTACCTGGCTGG   |
| HLA-DMA | ACCCATCGCTGAGGTGTTCA      | CCCATTCTTCCACAGGAG        | CACTGACGGTGACCT<br>GGGAGCATCACT   |
| HMOX1   | AACGCCACCAAGTTCAAGCA      | GTTGAGCAGGAAGGCGGTCT      | ACCGTCCCCGAATGA<br>ACACTCTGGAGA   |
| HS3ST2  | GGCACCCCTGGGCAAT          | GCAATTTCCAGGACCTTTATG     | CCAGATGGCTTCCCCT<br>TGGC          |
| ICAM1   | AAGTGGGCACACCCGTTTCT      | GGAGGGAGTCGCCATTATGC      | CCTTGATGGACTGTT<br>CCCAGCCTCAG    |
| IGF1R   | CTGCCCCACAGACTCAGG        | TGTCTCTCGTCAAGCTGGC       | CCTGGGCCGTTTCTCA<br>GCCTTGTGT     |
| IL18    | TCATACGAAATCTGAACGACCAAGT | CTGAGGTGCATTATCTGAACAGTCA | TCAGGCATATCTCAA<br>ACACGGCTTGA    |
| IL1B    | CCTCTCTCAGAGCCCATCC       | AGAAGCTGGGTGCCAAGGAC      | CAGCCTGGTGGAAC<br>CATGGCACACTA    |
| IL1RN   | GTTACCTAATCTTTTCTCTTTTCC  | TGCATCTGCAAGGTCTTCTT      | TCAGAGACTGCCTGC<br>CACCCCTTG      |
| IL2RA   | CTGGGAAAGCCGAGGAAAC       | TGGCAATAACGTTGAGAAGATAAGC | CCACTGAGCACCTACT<br>GTATGCGGGCT   |
| IL6     | TGTCGAGGCTGTGCAGATTAGTA   | TGGTGGCTTTGTCTGGATTCT     | AGCACTGATCCAGAC<br>CCTGAGGCAAA    |
| IL8     | CAGCCCGTGTAACATGACT       | CACAGAGAGCTGCAGAAAGCA     | AAAAGTCCAAAGAAG<br>GCAACA         |
| IRS1    | TGCTGGCATAGGCGCTTAAA      | AAGGACTTCAAACAGCGCCC      | CCTCCTCATCAGCCTC<br>TGGGCAACAGT   |
| ITGAM   | ATCGCTGTCTGCCAGAAAATC     | GAGGGTGACCTTGAGTTCTTCT    | AGTGTGACATCCCATC<br>CTTCGGCATC    |
| ITGB2   | CTGCTCAGGGCTCTCAACGA      | GACGAAGGGAAGCACCGTCT      | TGTCCACGAAAGACC<br>CAAAGCCGATG    |
| LAIR1   | AATCTCTCCAGGACGGGCAC      | AGACAGAGCGGAAGCACAG       | CCATGCCCCAGCCCC<br>TGCAG          |

|                      |                          |                            |                                   |
|----------------------|--------------------------|----------------------------|-----------------------------------|
| LEP                  | CTGGCTGCTGAAGCCTTGAA     | CGCACAGGCTCTCTTCTCCA       | AGCTCAGGTTTCTTCC<br>CCCAGCTGTGG   |
| MEOX2                | CTCGTCTTGATAATCGCGG      | CAGAGCTTGGTGCTGCTGCT       | CATCACCATCACCACC<br>ATCACCACCAG   |
| MFSD1                | TGAACCTCATGGGATGGCTG     | TCCAAGTAAGCAAGGGCCAA       | TGGTCACACAACCCTT<br>GGGGTCACACT   |
| MGP                  | TTTATATCGCCACAGCAGAGATG  | CGCAAGCTTCCCGTTTAA         | CGAAAGCCCAAGAGA<br>GAATCCGAGAACTC |
| MMP9                 | CGCTCAATTTCACTCGCGTAT    | CTCCGTGCTCCTTAACACCAA      | CCCAACGCCGACATC<br>GTTATCCA       |
| MPO                  | CTCTGCTGCTGAGCCAGGTC     | AACAACCGCTCCCGAATCTC       | CCAAGCTGAATCGCC<br>AGAACCAAATCG   |
| NCF1                 | TTCTGGTGAAGTGGCAGGA      | GGATGATCCTGTTCTCCGGG       | CGCCGGTAGACCAGC<br>TTCTCAGACAGG   |
| NPL                  | TCCTGAAGGAGGTGGCTGCT     | AGCCCTTGAAGGTGGGAAT        | AATCCCATCCAACAAC<br>TCTTCCGCACG   |
| PAI-1                | CAGGATAGGAGCGCAGGCTT     | GTGGCAGACAGCGCAAGAGT       | ACAGCAACGTGACTG<br>GAACGCAAATCA   |
| PECAM1               | CCAGGTGCTGTTCTATAAGGATGA | CGGGCTTCGGAATGAAAT         | TCACAACGTCTCCTCC<br>ACGAAGAACACAG |
| PLA2G7 (Lp-<br>PLA2) | GGCACCTTCTGCGTTTGTA      | GGGATCCAGAGGGTGCAGA        | TATCCGTCCCAAGATG<br>GTGACCC       |
| PLAUR                | CCTCCAATGGCTTGCACTG      | TGCCTGTGGCTTCCAGACAT       | CGGAACATCCATGAGT<br>GCTGTTCCCT    |
| PPARA                | AGTTCAATGCGCTGGAGCTG     | CATGCACGATACCCTCCTGC       | CTCCGCAGCAAATGAT<br>AGCAGCCACAA   |
| PPARD                | CGCTGTCAAGTTCAATGCC      | GACACGTTTATGAGGCCTGG       | TTCATCGCAGCCATCA<br>TTCTGTGTGGA   |
| PPARG                | ATGACAGCGACCTGGCGATA     | CGATGGGCTTACATTGAGC        | TCATTATTCTCAGTGG<br>AGACCGCCACG   |
| PPIA                 | ATGTGCCAGGGTGGTACTT      | ATGCCAGGACCCGTATGCTT       | CCATAGATGGACTTGC<br>CACCAGTGCCA   |
| PTAFR                | GCAGCATGCCCGTACTCATC     | CTTGACCTCTGCATTGCGCT       | CTTCTGCAACCTGGTC<br>ATCATCCGCAC   |
| PTGS1                | CAGGGCGCCAACCTCAT        | TCTTGAAGAACTGGTGGGTGAA     | TTTGCTTCTTTGCC<br>AACA            |
| PTGS2                | TGTATCCTCCGACAGCCAAAG    | GCGGAGGTGTTGAGGAGTGT       | CACTCAAGTCGAGATG<br>ATCTACCCGCCT  |
| RAGE                 | CCGGAGCGTCTGTTCTAAGC     | TAGAAGCCGTCGGTGAGCAG       | CACACAGAGTACGTCT<br>CCACCCGCTGG   |
| RPL27                | GTAATCTTTCTCTTTCCGCTGTAT | ACCTTCCCGGGTTTCATGA        | CTTGCCCATTTGAGCA<br>GCGACCACT     |
| RPL32                | GCGCAGCGAAGAAAATGAA      | AGGATACTAGCTGGGTGCTTAATCTG | TGAGCCACAACCTGGA<br>ACTCTGTAT     |

|         |                         |                       |                                  |
|---------|-------------------------|-----------------------|----------------------------------|
| SCARB1  | GCAGGTTCAATGCACCCTTG    | GGTGACCGGATGAATGTCCA  | AGGCAGTGTCTGGCC<br>TCCACCCTAACA  |
| SLC27A4 | CCGCATCCTGTCCTTTGTGT    | CCCGGATCAGCTCCATAGTGT | ATCCGGCTGGTCCGT<br>GTCAACG       |
| SMTN    | CGTCCCAACAGTGGCTCAA     | GCTCTTGTTCCTGTGGCTTCA | CACCTCACACCGTTCC<br>AGCCTGTGT    |
| TGFB1   | GCCCACTTGGGATCGATTAAA   | CCGGTAACGTCCGAAGGAAG  | CCCAACACACGGAGA<br>CCCAGTCCTCTC  |
| TIMP1   | TCACAGGCTCTGACAAGGGC    | GGACTGCCAGGTGCACATTC  | TCCAGAGCCGCCACC<br>TTGCCTG       |
| TM7SF1  | CTCCCGAGCCTGCTACAACC    | ACCACGCCAAACACCACGTA  | CGACTGGTACAACGT<br>GTCAGACCAGGCA |
| TNF     | CAAGGACTCAGATCATCGTCTCA | CGGCTTTGACATTGGCTACA  | CCTCAGATAAGCCCGT<br>CGCCCA       |
| UCP2    | AGTTCTCCGTTGCCTCTCATG   | GCCAGGCTTCCCACAGTGT   | TTTGTCCCCATGGAGT<br>TGACCCCA     |
| VCAM1   | TCGTCGTGATCTTTGGAGCC    | GCAAGTCAGGGAAGCGGAGT  | TCTGCGAATCATTTT<br>GTCTTCAGGGA   |

### Supplementary methods.

**Animal model.** We measured blood glucose levels daily for the first week after induction of diabetes, followed by weekly checks or daily, in cases in which the serum glucose level was  $>350$  mg dl<sup>-1</sup>. Insulin was administered based on glucose levels: 350-400 mg dl<sup>-1</sup>: 11 units of long-acting insulin s.q., 401-450: 16 units, 451-500 22 units,  $>500$  mg dl<sup>-1</sup>: 25 units. The average units of administered insulin per animal over the duration of the study did not differ between groups (control-  $798 \pm 581$ , treated  $682 \pm 493$ ,  $p=0.52$ ). No animal suffered ketoacidosis.

To achieve hypercholesterolemia we generally administered the animals a diet consisting of 0.5% cholesterol, 5% lard and 0.4% sodium cholate. In those animals that did not achieve a serum cholesterol level over 400 mg dl<sup>-1</sup> the diet was changed to one consisting of 2.0% cholesterol, 20% lard and 1.5% sodium cholate (both diets from Animal Specialties). During the entire study 4 animals in the DM/HC control group received the higher cholesterol diet (1 throughout the study period, 1 for a total of 45 days, 1 for 30 days and 1 for 15 days) while 2 animals in the treatment group received the higher diet (1 for the entire study and 1 for 15 days). If the serum cholesterol level exceeded 800 mg dl<sup>-1</sup>.the diet was adjusted by adding normal pig chow to the 0.5% cholesterol diet. If, however, the cholesterol level remained above 800 mg dl<sup>-1</sup>.for 2 consecutive months, the animal was removed from the study and excluded from analysis. A number of animals, in both groups, exhibited cholesterol levels exceeding 800 mg dl<sup>-1</sup>

transiently so that the mean cholesterol level approached or exceeded 800 mg dl<sup>-1</sup> at individual time points.

We collected blood samples at baseline and at monthly intervals for analysis of plasma Lp-PLA<sub>2</sub> activity from the jugular vein after the area around the manubrium sterni was shaved and cleaned with Nolvosan<sup>tm</sup>. Following sedation with a single IM injection of 20 mg/kg of ketamine, 0.06 mg kg<sup>-1</sup> of medetomidine, and 0.06 mg kg<sup>-1</sup> of atropine anesthesia was maintained with 1-3% isoflurane. Blood was collected into EDTA-containing Vacutainer tubes (Kendal Tyco Health).

We also collected blood (100ml) for PBMC isolation in tubes containing 15% EDTA (Kendal Tyco Health). Equal volume of PBS (without Ca<sup>++</sup> and Mg<sup>++</sup>, Invitrogen Carlsbad, CA) was added and mixed well by gentle pipetting. Ficoll-Plaque Plus (15 ml) (Invitrogen Carlsbad, CA) was added in 50 ml conical tubes. The diluted blood sample was carefully layered over Ficoll-Plaque Plus. Samples were centrifuged at 600-740g for 20 min at room temperature. Following centrifugation, the mononuclear cell layer was transferred into a new tube, PBS was added (3x volume) and the solution was mixed well with a pipette. Samples were centrifuged at 740-980g for 10 min (4°C), supernatants were removed and the cells re-suspended in PBS. Cells were then separated into three 15 ml tubes (culturing, RNA isolation, protein isolation). Samples were centrifuged at 118g for 5 min (RT or at 4 °C) and supernatant was removed. Cells were then placed in Tri-reagent (Invitrogen) for RNA isolation. Approximately 5-6% of mononuclear cells were monocytes.

The mean body weights at study entry were: DM/HC control 30.6 ± 1.0 kg (*n*=17), DM/HC darapladib treated 29.5 ± 0.9 kg (*n*=20) and non DM/non HC control 37.7 ± 3.8 kg (*n*=3). At the end of the study the weights increased in the DM/HC control group to 50.9 ± 3.7 kg (a 66.5% increase in weight), DM/HC darapladib treated 62.5 ± 4.5 kg (111.6%) and non-DM/non-HC control 109.6 ± 10.0 kg (191.0%). Although treated animals exhibited greater weight gain than DM/HC control animals, the increase did not achieve statistical significance.

**Histological evaluation.** We stained and subsequently analyzed left anterior descending coronary arterial sections with Movat's pentachrome. Four to eight sections, each 5 mm in length, were evaluated per artery. Each section was immediately placed in formaldehyde with the distal edge marked. Only sections cut perpendicular to the plane of the lumen and without side branches were used for analysis. We evaluated on average 5.1 sections in the control group and 5.8 sections in the treated group. Morphometric analysis of the left anterior descending artery was performed to determine the lumen area, and areas subtended by the internal elastic lamina (IEL) and external elastic lamina (EEL). Medial area was calculated as the EEL minus –the IEL area and the plaque area was calculated as the IEL-lumen area. Morphometric analysis was performed using a NIH imaging software system. The results presented reflect the average

intimal area of all the evaluated sections in each artery. In addition the arteries were evaluated for fibrous cap thickness and lesions were classified using the modified AHA/Virmani score.<sup>7</sup> All analyses were performed by investigators blinded to the study group.

We determined destruction of the tunica media using the following 0–4 scale:

0 - no medial destruction

1 - internal elastic lamina disrupted but no overt medial destruction

2 - destruction of <50% of the medial thickness,

3 - destruction of >50% of the medial thickness with the EEL intact

4 - destruction of >50% of the medial thickness with the EEL disrupted.

**Immunohistochemistry.** Following deparaffinization, rehydration and heat-induced antigen retrieval we blocked sections with 3% hydrogen peroxide, avidin/biotin and protein block (DakoCytomation). A goat polyclonal cathepsin-S antibody (Santa Cruz Biotechnology Inc) at a concentration of  $3 \mu\text{g ml}^{-1}$  was applied for 30 min. Omission of the primary antibody and an isotype matched IgG (Southern Biotechnology) was used as negative controls. The primary antibody was labeled with an anti-goat biotinylated secondary antibody (Jackson ImmunoResearch) diluted 1:200 and streptavidin-hrp (Dako Cytomation). Staining was detected with 3, 3 diaminobenzidine (DAB) and counterstained with hematoxylin. Slides were dehydrated, cleared and coverslipped. The intimal area and Cathepsin S positive (CS+) area of left anterior descending arteries (LADs) from treated and untreated animals was determined by morphometric analysis using Image-Pro Plus (MediaCybernetics).

For immunofluorescence, we prepared the slides as described above. For antigen retrieval, slides were incubated with proteinase K (DakoCytomation) for 20 min at room temperature followed by extensive rinsing with 1 x PBS. Slides were blocked for 90 min at room temperature with 10% total serum (for triple stain, 3.3% of serum from the species in which the respective primary antibodies were raised). Primary Antibodies were added to the slides (anti-Smooth Muscle  $\alpha$ -actin, [Sigma-Aldrich], anti collagen I/III [Abd-Serotec], anti-Cathepsin S [Santa Cruz Biotechnology]) and incubated at 4 °C for 16 hrs. Slides were rinsed with 1 x PBS. Respective labeled secondary antibodies (AMCA, Texas Red, and FITC) were added to the slides and incubated for 120 minutes at room temperature. Slides were rinsed extensively with 1 x PBS and mounted with “Vectashield” hard set mounting media (Vector Laboratories).

For light microscopic images we used a Leica DM4000 B microscope utilizing the 5x, and 40x Leica objectives. Imaging was performed with a Leica DC 480 camera. Image-pro Plus 6.2 software package was used for processing and saving images.

The fluorescent microscopy images were obtained utilizing the same microscope making use of the 10x, and 20x objectives. Images were obtained by a Leica

DFC340 FX camera utilizing EL 6000 fluorescent source. Image-pro Plus 6.2 software was used for processing and saving images.

**Measurement of cholesterol and lipoprotein Lp-PLA<sub>2</sub> activity within lipoprotein fractions.** We measured lipoprotein fractions for cholesterol and Lp-PLA<sub>2</sub> as follows: cholesterol determination was performed using Infinity Cholesterol reagent (Thermo Corp cat #TR13421/2350-250) per manufacturer's instructions. Briefly, 150  $\mu$ l of cholesterol reagent was added to 50  $\mu$ l of fraction and incubated for 15 min at 37 °C. Samples are read in a fluorescence plate reader at 590 nm. To determine Lp-PLA<sub>2</sub> activity within the fractions we incubated 150  $\mu$ l of the fraction with 40  $\mu$ l assay buffer (20 mM HEPES, 150 mM NaCl, PH 7.4) and 10  $\mu$ l of 1 mM [<sup>3</sup>H]-PAF at 37 °C for 5 min.

**Measurement of arterial Lp-PLA<sub>2</sub> activity and phospholipids.** Frozen iliac sections were ground into small pieces using a mortar and pestle on dry ice, insuring that the samples remained frozen. Approximately 100 mg of frozen homogenate was weighed out as accurately as possible. Arterial samples were homogenized using a Polytron after addition of 1 ml buffer (mmol/L: Tris50 [pH 8], CHAPS 10, EGTA 2, EDTA 2, and 1 mg ml<sup>-1</sup> of each of the protease inhibitors leupeptin, antipain, and pepstatin-A) per 100 mg of tissue. Samples were kept cool at all times. Homogenates were then centrifuged for 10 minutes at 4 °C at 335g prior to transferring supernatants to fresh tubes. The supernatant was diluted to 2 mg protein ml<sup>-1</sup> with homogenization buffer prior to analysis for Lp-PLA<sub>2</sub> activity. To define the contribution of Lp-PLA<sub>2</sub> to the total aortic "PAF-AH" activity, we assayed the supernatant of the iliac homogenate in the presence or absence of a saturating concentration of the potent and selective Lp-PLA<sub>2</sub> inhibitor SB480848 (i.e., 1  $\mu$ M final concentration from DMSO stock). In brief, 25  $\mu$ l of supernatant (50  $\mu$ g protein/tube) was added to tubes containing 165  $\mu$ l buffer (20 mM HEPES, 150 mM NaCl, PH 7.4  $\pm$  SB480848) and 10  $\mu$ l of 1 mM [<sup>3</sup>H]-PAF and incubated at 37 °C for 30 mins.

For mass spectrometry we added approximately 100 mg of frozen ground iliac artery powder to 2 ml chloroform and 1 ml methanol, together with internal standards dimyristoyl phosphatidylcholine (40 nmoles), lysoheptadecoyl phosphatidylcholine (4 nmoles) and butylated hydroxytoluene (50  $\mu$ g ml<sup>-1</sup>). Samples were then homogenized with an Ultraturrex homogenizer for two minutes, with cooling in an ice bath. After further addition of 3 ml methanol and 1.6 ml (0.9% w:v) NaCl, extracts were vigorously shaken to obtain a single phase. Chloroform (2 ml) and water (2 ml) were then added with further shaking to form two phases which were then separated by centrifugation at 400g for ten min. The lower chloroform layer was decanted, dried under nitrogen gas and the dried extracts were stored under nitrogen at -80°C until analysis.

In order to perform electrospray ionisation mass spectrometry we dissolved dried lipid extracts in solvent (methanol:chloroform:water 70:20:10 v:v, 50  $\mu$ l) and injected 10  $\mu$ l into a mobile phase of the same solvent delivered by a Waters 1525 HPLC at 10  $\mu$ l min<sup>-1</sup> into the electrospray ionization interface of a Quattro

Micro triple quadrupole mass spectrometer (both Waters). Collision gas-induced dissociation of all protonated PC, oxidized PC and LPC species generated a diagnostic phosphorylcholine fragment of  $m/z=184$ . Consequently, diagnostic precursor scans of  $m/z=184$  were used to quantify PC species. We collected data in continuum mode and spectra were averaged over the eluting samples peak to provide the data for analysis. We obtained mass spectrometric data at unit resolution and processed using MassLynx software (Micromass). After conversion to centroid format, ion intensities were corrected for the  $^{13}\text{C}$  effect and the progressive decreasing formation of the diagnostic ion with increasing molecular mass. Concentrations of PC and oxPC species were calculated with reference to the dimyristoyl PC internal standard and lyso PC species by reference to the lysoheptadecoyl PC standard as previously described.<sup>16</sup>

Concentrations of 27 identified PC species were calculated with reference to the dimyristoyl PC internal standard; fractional compositional values are reported for the 16 most abundant PC species, but all 27 species were used for calculation of total PC concentration. Similarly, concentrations of the 10 identified lyso PC species were calculated with reference to the lysoheptadecoyl PC standard. Ion peaks with  $m/z$  values characteristic of oxPC were identified in the mass range  $m/z$  594-666 and quantified with reference to the dimyristoyl PC internal standard, as their extraction and ionisation efficiencies were comparable to unmodified PC species. These ion peaks most likely represent oxPC species where the modified fatty acyl esterified at the *sn*-2 position has undergone non-enzymatic cleavage to generate shorter chain aldehyde and carboxyl substituted moieties. We made no attempt to determine structural compositions and, as the diagnostic precursor scan of  $m/z$  184 recognizes all lipid molecules containing the phosphocholine headgroup, these ion peaks very probably contain multiple individual molecular species. Consequently, this analysis provides an assessment of the maximum contribution of oxidised species to the overall PC composition. The presence of oxPC species at these nominal masses was confirmed by exact mass analysis on an LTQ Orbitrap XL mass spectrometer (ThermoFisher) as described previously<sup>16</sup>.

**Gene expression using quantitative real-time PCR.** For quantification of RNA we arrayed the RNA equivalent of 10 ng mRNA per well into 384-well plates using a Biomek FX robot (Beckman Coulter) and quantitative RT-PCR was carried out using a 7900HT Sequence Detector System (Applied Biosystems) in a 5  $\mu\text{l}$  reaction volume. TaqMan Universal PCR Master Mix 2X (Applied Biosystems) and universal PCR conditions recommended by the manufacturer were followed.

We analyzed the Taqman gene expression data based on normalized expression values, using scaled geometric mean of the selected reference genes for the normalization factor calculations. The raw Taqman intensity levels for the coronary tissue samples were normalized against the intensities of three housekeeper genes (cyclophilin, RPL27 and RPL32) having self-consistent



results. The PBMC expression normalization also used three reference genes (cyclophilin and RPL27, plus BSG, a gene with similar stability in this study). This PBMC normalization did not use RPL32 expression levels as the PBMC samples showed significant RPL32 changes during the DM/HC induction period (week zero to week four).
